# Supplementary material
Source: MDPI journal article supplement (https://www.mdpi.com/2072-4292/15/2/541)
Supplement: s1 [file s1]

## Supplementary Material

**Table S1.** Values of geometric characteristics ( $R_c$ ,  $h_c$ ,  $h_{tree}$  and  $h_{trunk}$ ) obtained from the UAV survey and from manual measurements.

| Density of<br>plantation | TREE                                            | $R_c$ (m)   |        | $h_c$ (m) |        | $h_{tree}$ (m) |        | $h_{trunk}$ (m) |        |
|--------------------------|-------------------------------------------------|-------------|--------|-----------|--------|----------------|--------|-----------------|--------|
| plant ha <sup>-1</sup>   | (row number<br>and tree<br>position per<br>row) | UAV         | manual | UAV       | Manual | UAV            | manual | UAV             | manual |
| 625                      | 4_38                                            | 0.96        | 0.91   | 1.46      | 1.55   | 2.40           | 2.20   | 0.89            | 0.65   |
| 625                      | 4_39                                            | 0.92        | 0.93   | 1.54      | 1.25   | 2.10           | 1.75   | 0.50            | 0.50   |
| 625                      | 4_40                                            | 0.88        | 0.93   | 1.61      | 1.55   | 2.26           | 2.10   | 0.55            | 0.55   |
| 625                      | 4_41                                            | 0.97        | 1.06   | 2.09      | 1.70   | 2.49           | 2.25   | 0.41            | 0.55   |
| 625                      | 4_42                                            | 0.77        | 0.88   | 1.63      | 1.45   | 2.36           | 2.15   | 0.63            | 0.70   |
| 625                      | 4_43                                            | 0.69        | 0.81   | 1.45      | 1.80   | 2.19           | 2.25   | 0.59            | 0.45   |
| 625                      | 5_38                                            | 0.98        | 1.07   | 1.66      | 1.45   | 2.38           | 2.20   | 0.68            | 0.75   |
| 625                      | 5_39                                            | 1.09        | 1.19   | 1.56      | 1.30   | 2.13           | 1.90   | 0.52            | 0.60   |
| 625                      | 5_40                                            | 0.88        | 0.79   | 1.41      | 1.90   | 2.25           | 2.30   | 0.87            | 0.40   |
| 625                      | 5_41                                            | 0.71        | 0.83   | 1.90      | 1.45   | 2.53           | 2.15   | 0.45            | 0.70   |
| 625                      | 5_42                                            | 0.79        | 0.94   | 1.58      | 1.36   | 2.19           | 2.00   | 0.48            | 0.64   |
| 625                      | 5_43                                            | 0.61        | 0.74   | 1.39      | 1.80   | 2.05           | 2.10   | 0.59            | 0.30   |
| 625                      | 6_38                                            | 0.95        | 0.85   | 1.67      | 2.05   | 2.45           | 2.25   | 0.67            | 0.20   |
| 625                      | 6_39                                            | 1.02        | 0.90   | 1.64      | 1.70   | 2.31           | 2.20   | 0.69            | 0.50   |
| 625                      | 6_40                                            | 0.92        | 0.73   | 1.48      | 1.67   | 2.19           | 2.20   | 0.66            | 0.53   |
| 625                      | 6_41                                            | 0.49        | 0.68   | 0.99      | 1.20   | 1.68           | 1.70   | 0.49            | 0.50   |
| 625                      | 6_42                                            | 0.89        | 0.80   | 1.20      | 1.30   | 1.85           | 1.90   | 0.58            | 0.60   |
| 625                      | 6_43                                            | <b>0.34</b> | 0.63   | 0.78      | 0.90   | 1.54           | 1.60   | 0.65            | 0.70   |
| 1250                     | 4_26                                            | 0.74        | 0.71   | 1.60      | 1.70   | 2.36           | 2.20   | 0.73            | 0.50   |
| 1250                     | 4_29                                            | 0.97        | 0.93   | 2.10      | 2.00   | 2.56           | 2.45   | 0.42            | 0.45   |
| 1250                     | 4_31                                            | 0.91        | 0.89   | 1.62      | 1.85   | 2.38           | 2.35   | 0.70            | 0.50   |
| 1250                     | 4_32                                            | 0.77        | 0.74   | 1.51      | 1.40   | 2.37           | 2.10   | 0.84            | 0.70   |
| 1250                     | 4_35                                            | 0.94        | 0.85   | 2.21      | 1.70   | 3.01           | 2.45   | 0.77            | 0.75   |
| 1250                     | 4_37                                            | 1.01        | 0.91   | 1.61      | 2.20   | 2.16           | 2.70   | 0.44            | 0.50   |
| 1250                     | 5_26                                            | 1.15        | 1.03   | 2.20      | 1.75   | 2.76           | 2.30   | 0.57            | 0.55   |
| 1250                     | 5_29                                            | 1.04        | 0.79   | 2.42      | 2.05   | 2.95           | 2.65   | 0.53            | 0.60   |

|      |      |      |      |      |      |      |      |      |      |
|------|------|------|------|------|------|------|------|------|------|
| 1250 | 5_31 | 0.84 | 0.84 | 1.73 | 1.40 | 2.28 | 2.20 | 0.54 | 0.80 |
| 1250 | 5_33 | 1.04 | 0.85 | 1.86 | 1.50 | 2.50 | 2.35 | 0.61 | 0.85 |
| 1250 | 5_34 | 0.92 | 0.91 | 1.68 | 1.70 | 2.42 | 2.35 | 0.67 | 0.65 |
| 1250 | 5_36 | 0.79 | 0.84 | 1.60 | 1.50 | 2.28 | 2.20 | 0.67 | 0.70 |
| 1250 | 6_25 | 0.92 | 0.86 | 1.79 | 1.85 | 2.42 | 2.30 | 0.64 | 0.45 |
| 1250 | 6_27 | 0.91 | 0.98 | 1.64 | 1.65 | 2.38 | 2.10 | 0.71 | 0.45 |
| 1250 | 6_28 | 0.98 | 0.98 | 1.44 | 1.70 | 2.16 | 2.25 | 0.69 | 0.55 |
| 1250 | 6_32 | 1.01 | 0.98 | 1.84 | 1.90 | 2.36 | 2.35 | 0.56 | 0.45 |
| 1250 | 6_34 | 0.91 | 0.89 | 1.88 | 1.80 | 2.68 | 2.40 | 0.80 | 0.60 |
| 1250 | 6_37 | 0.83 | 1.00 | 1.46 | 1.75 | 2.19 | 2.40 | 0.73 | 0.65 |

**Table S2.** Canopy volume obtained from UAV survey and manual measurements.

| Density of<br>plantation | TREE                                            | Volume V <sub>1</sub> (m <sup>3</sup> ) |        | Volume V <sub>2</sub> (m <sup>3</sup> ) |
|--------------------------|-------------------------------------------------|-----------------------------------------|--------|-----------------------------------------|
| plant ha <sup>-1</sup>   | (row<br>number and<br>tree position<br>per row) | UAV                                     | manual | UAV                                     |
| 625                      | 4_38                                            | 2.918                                   | 4.055  | 1.857                                   |
| 625                      | 4_39                                            | 2.635                                   | 3.360  | 2.016                                   |
| 625                      | 4_40                                            | 2.421                                   | 4.166  | 2.038                                   |
| 625                      | 4_41                                            | 2.944                                   | 6.029  | 2.445                                   |
| 625                      | 4_42                                            | 1.843                                   | 3.488  | 1.295                                   |
| 625                      | 4_43                                            | 1.501                                   | 3.733  | 0.726                                   |
| 625                      | 5_38                                            | 3.025                                   | 5.215  | 1.679                                   |
| 625                      | 5_39                                            | 3.718                                   | 5.759  | 2.716                                   |
| 625                      | 5_40                                            | 2.427                                   | 3.702  | 1.932                                   |
| 625                      | 5_41                                            | 1.564                                   | 3.100  | 1.310                                   |
| 625                      | 5_42                                            | 1.965                                   | 3.755  | 1.354                                   |
| 625                      | 5_43                                            | 1.168                                   | 3.076  | 0.656                                   |
| 625                      | 6_38                                            | 2.817                                   | 4.653  | 1.662                                   |
| 625                      | 6_39                                            | 3.293                                   | 4.326  | 2.063                                   |
| 625                      | 6_40                                            | 2.642                                   | 2.758  | 1.341                                   |
| 625                      | 6_41                                            | 0.748                                   | 1.718  | 0.355                                   |
| 625                      | 6_42                                            | 2.469                                   | 2.614  | 1.149                                   |
| 625                      | 6_43                                            | 0.368                                   | 1.104  | 0.180                                   |
| 1250                     | 4_26                                            | 1.698                                   | 2.711  | 0.923                                   |
| 1250                     | 4_29                                            | 2.984                                   | 5.376  | 2.753                                   |
| 1250                     | 4_31                                            | 2.618                                   | 4.578  | 2.111                                   |

|      |      |       |       |       |
|------|------|-------|-------|-------|
| 1250 | 4_32 | 1.858 | 2.392 | 1.200 |
| 1250 | 4_35 | 2.790 | 3.859 | 2.370 |
| 1250 | 4_37 | 3.192 | 5.755 | 2.178 |
| 1250 | 5_26 | 4.152 | 5.776 | 4.188 |
| 1250 | 5_29 | 3.378 | 3.994 | 3.410 |
| 1250 | 5_31 | 2.218 | 3.085 | 1.922 |
| 1250 | 5_33 | 3.397 | 3.365 | 3.148 |
| 1250 | 5_34 | 2.638 | 4.447 | 1.932 |
| 1250 | 5_36 | 1.980 | 3.305 | 1.617 |
| 1250 | 6_25 | 2.656 | 4.324 | 1.776 |
| 1250 | 6_27 | 2.615 | 4.928 | 1.698 |
| 1250 | 6_28 | 2.993 | 5.077 | 1.794 |
| 1250 | 6_32 | 3.180 | 5.674 | 2.892 |
| 1250 | 6_34 | 2.583 | 4.454 | 1.673 |
| 1250 | 6_37 | 2.164 | 5.498 | 1.168 |

---
